# Supplementary material
Source: PubMed Central journal article supplement (PMC4245853)
Supplement: Supp_Fig1.pdf [file Supp_Fig1.pdf]

## Supplementary Data

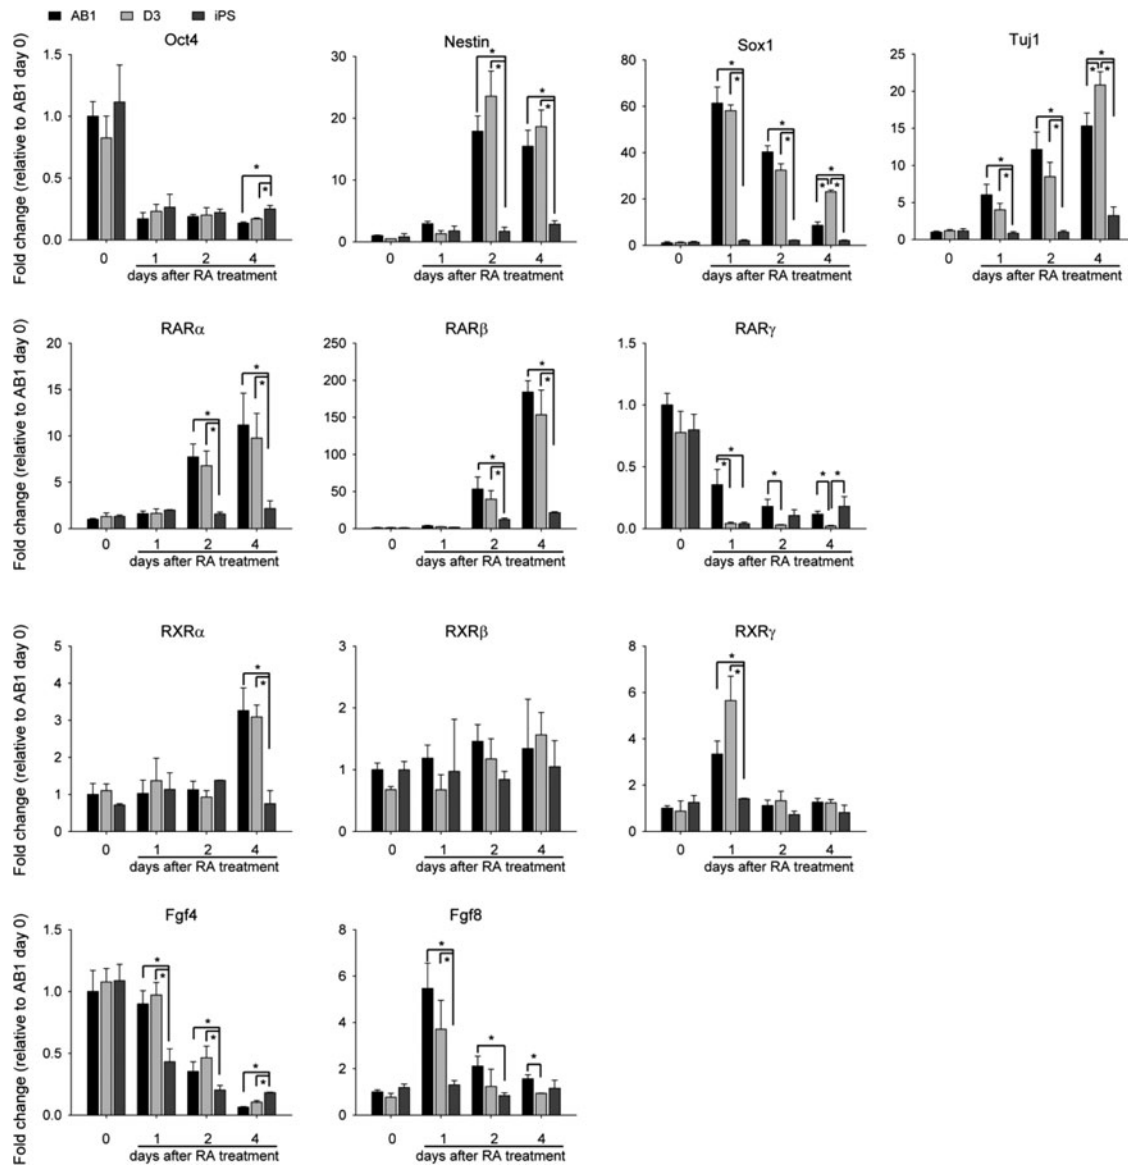

**SUPPLEMENTARY FIG. S1.** Similar expression pattern between ESC lines AB1 and D3. By qRT-PCR analysis, the expression pattern of indicated genes in AB1 and D3 during neural differentiation showed general similarity and the difference between ESCs and iPSCs was observed.
